# Supplementary material for: Long-Term Outcomes of Venous Resections in Pancreatic Ductal Adenocarcinoma Patients: A Nationwide Cohort Study
Source: PubMed Central journal article supplement — Ann Surg Open. 2022 Nov 2;3(4):e219. doi: 10.1097/AS9.0000000000000219 (PMC10406038; doi:10.1097/as9.0000000000000219), 2022-11-02

## TABLES

|                     | Variable          | Subtype                                         | Hazard ratio | p-value                      |
|---------------------|-------------------|-------------------------------------------------|--------------|------------------------------|
| <b>Multivariate</b> | Resection type*   | Pancreatic resection with venous resection      | 1.05         | 0.488                        |
|                     | Procedure type#   | Total pancreatectomy                            | 1.17         | 0.119                        |
|                     |                   | Distal pancreatectomy                           | 0.94         | 0.471                        |
|                     | Demographic       | Age                                             | 1.01         | <b>6.75x10<sup>-4</sup></b>  |
|                     |                   | Female gender                                   | 0.88         | <b>0.025</b>                 |
|                     |                   | Charlson comorbidity index                      | 1.07         | <b>1.62x10<sup>-6</sup></b>  |
|                     | Treatment related | Preoperative Chemotherapy                       | 0.90         | 0.352                        |
|                     |                   | Postoperative Chemotherapy                      | 0.67         | <b>2.27x10<sup>-8</sup></b>  |
|                     | Tumor histology** | T2 tumor                                        | 1.89         | <b>3.19x10<sup>-4</sup></b>  |
|                     |                   | T3 tumor                                        | 2.57         | <b>1.69x10<sup>-8</sup></b>  |
|                     |                   | T4 tumor                                        | 2.10         | <b>0.001</b>                 |
|                     |                   | N1 tumor                                        | 1.88         | 1.56x10 <sup>-12</sup>       |
|                     |                   | N2 tumor                                        | 2.04         | <b>2.00x10<sup>-16</sup></b> |
|                     | Resection margins | R1 resection\$                                  | 1.78         | <b>0.012</b>                 |
|                     |                   | R2 resection\$                                  | 1.30         | 0.204                        |
|                     |                   | Superior Mesenteric Vein Resection Margin in mm | 0.97         | <b>9.36x10<sup>-8</sup></b>  |

**Supplementary Table 1:** Results of the multivariate Cox proportional Hazard ratio model on the imputed dataset.

\*Compared with resections without venous resection

#Compared with pancreaticoduodenectomy

\*\*Compared with T1 stage (T stages) and N0 (N stages)

\$Compared with R0 resection

## FIGURES

**Supplementary Figure 1:** Kaplan-Meier survival curves for patients undergoing surgical exploration only (n=709), pancreatic resection with venous resection (n=423) and pancreatic resection without venous resection (n=1758), sub stratified on pathology N stage  
Log-rank test indicated a significant difference between groups ( $p=2 \times 10^{-16}$ )

**Supplementary Figure 2:** Kaplan-Meier survival curves for patients undergoing surgical exploration only (n=709), pancreatic resection with venous resection (n=423) and pancreatic resection without venous resection (n=1758), sub stratified on tumor distance to the superior mesenteric / portal vein.  
Log-rank test indicated a significant difference between groups ( $p=5 \times 10^{-6}$ )

**Supplementary Figure 3:** Kaplan-Meier survival curves for patients undergoing surgical exploration only (n=709), pancreatic resection with venous resection (n=423) and pancreatic resection without venous resection (n=1758), sub stratified on adjuvant chemotherapy  
Log-rank test indicated a significant difference between groups ( $p=2 \times 10^{-9}$ )

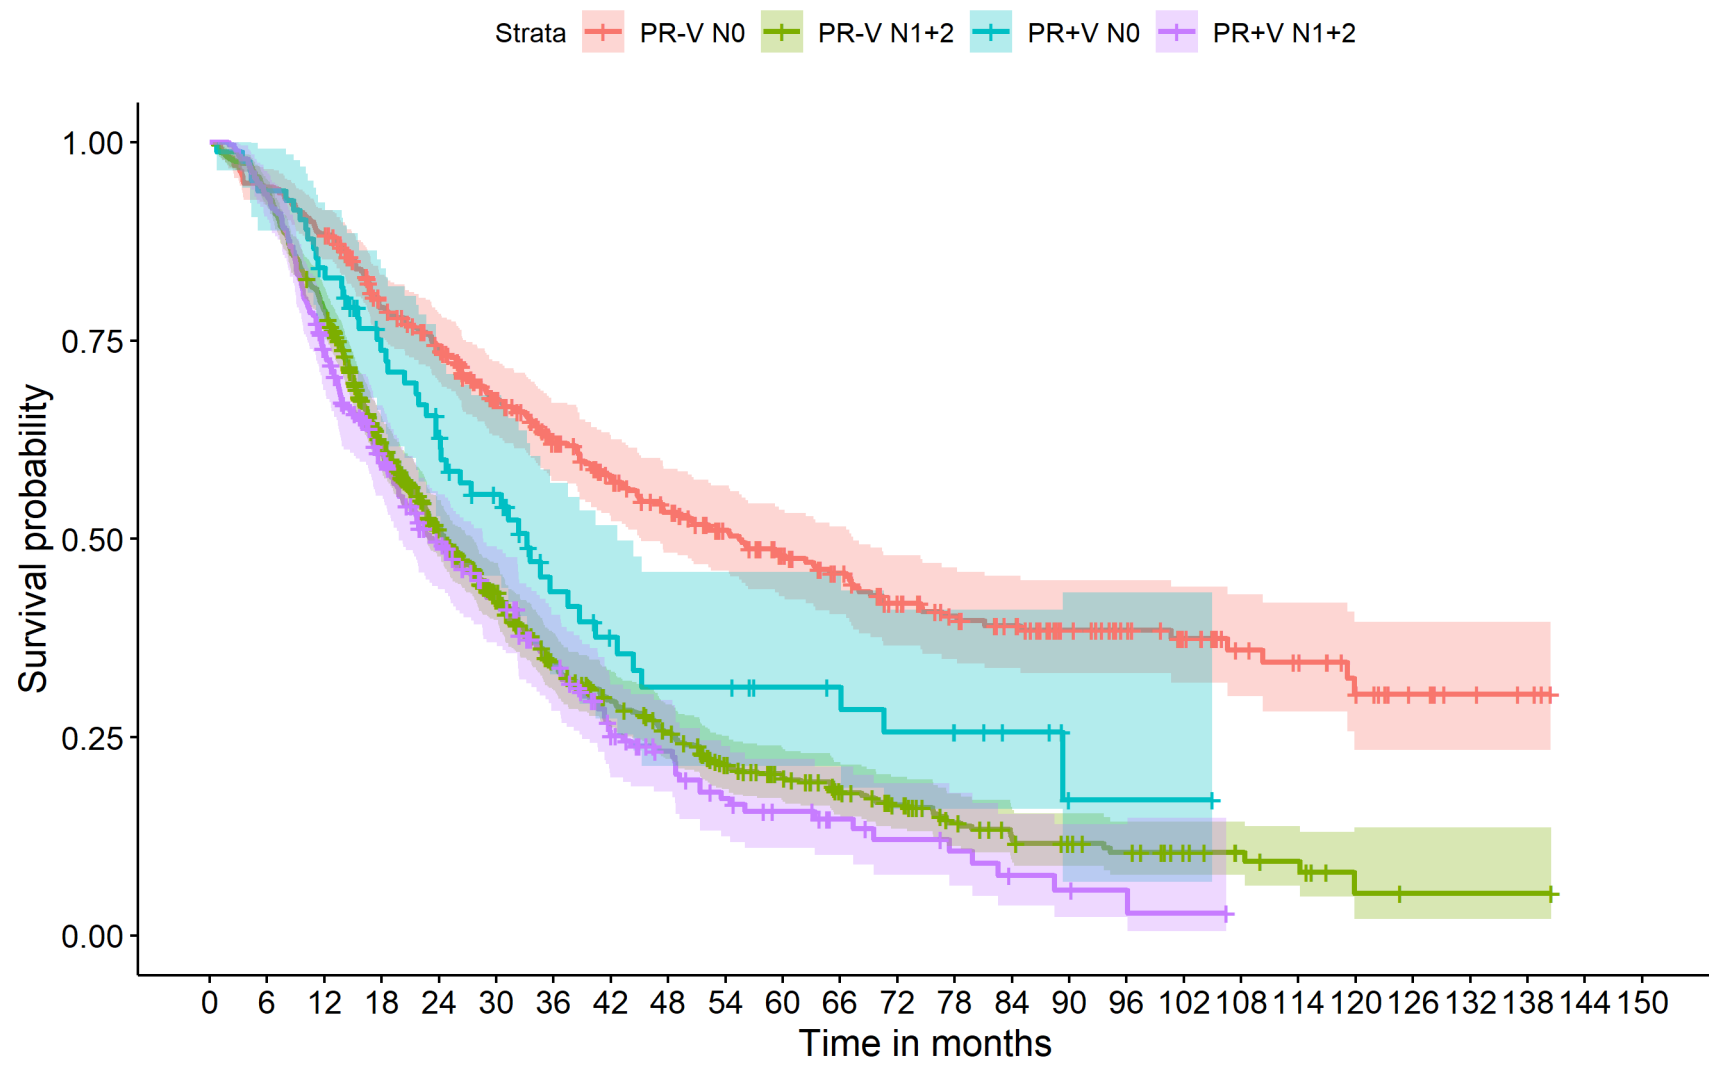

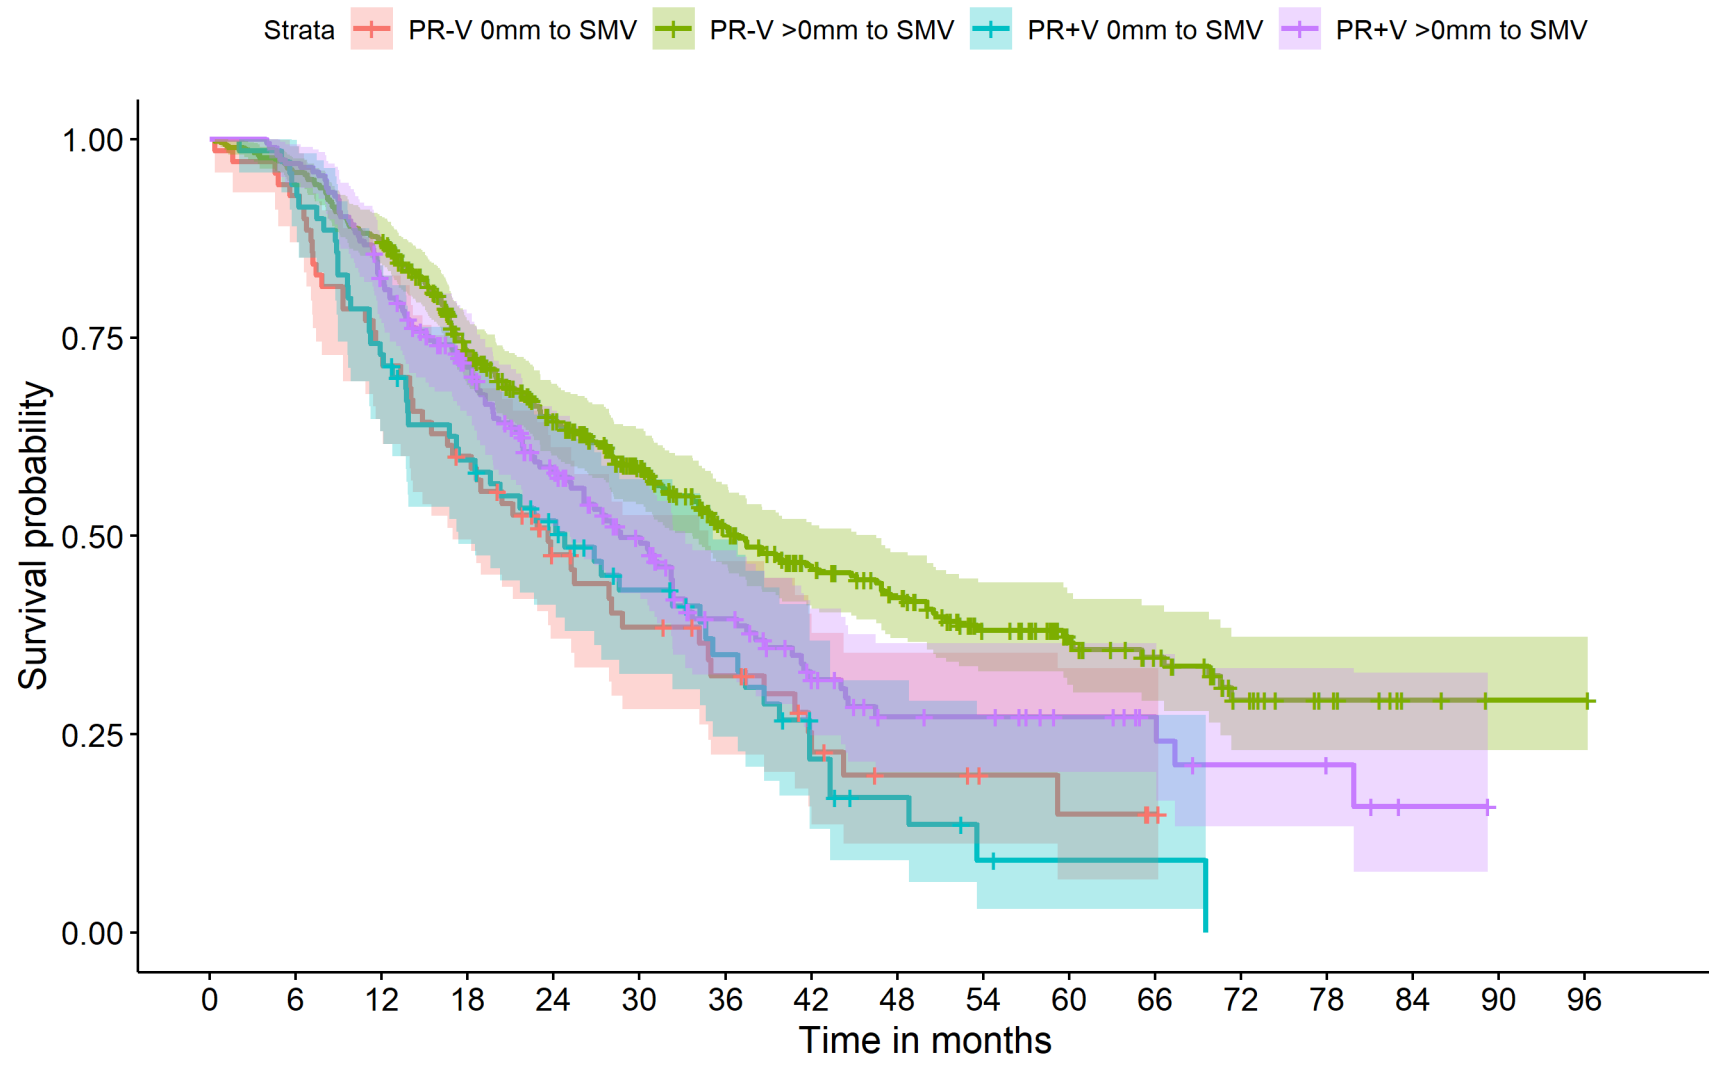

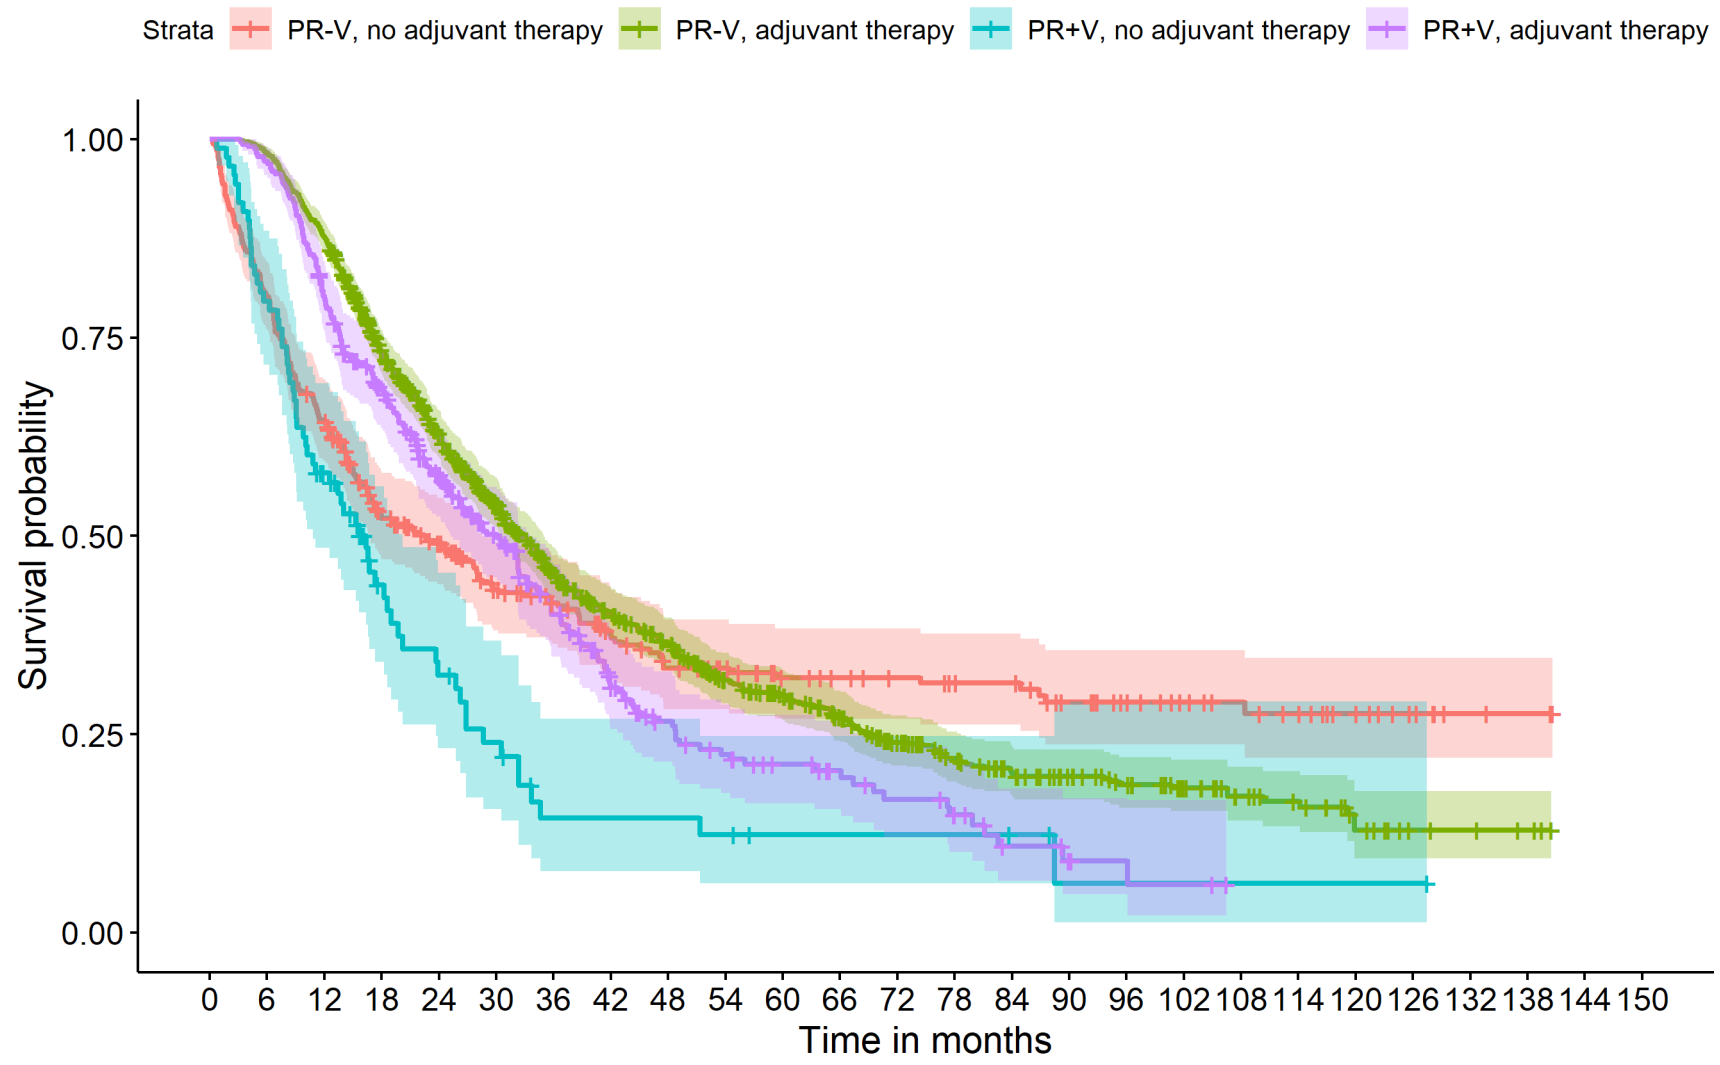

Supplement: as9-3-e219-s001.pdf [file as9-3-e219-s001.pdf]
